# Supplementary material for: Unraveling DPP4 Receptor Interactions with SARS-CoV-2 Variants and MERS-CoV: Insights into Pulmonary Disorders via Immunoinformatics and Molecular Dynamics
Source: MDPI journal article supplement (doi:10.3390/v15102056), 2023-10-06
Supplement: s1 [file s1]

**Table S1:** List of mutations for each variant of SARS CoV-2. The crucial mutations are marked in bold.

| SARS CoV-2 Variants | Mutation                                                                        |
|---------------------|---------------------------------------------------------------------------------|
| Alpha (B.1.1.7)     | 69del, 70del, 144del, V70L, D178H, <b>E484K</b> , N501Y, P681H, A570D           |
| Gamma (P.1)         | N501Y, K417T, <b>E484K</b>                                                      |
| Beta (B.1.351)      | N501Y, K417N, E484K, L18F, D80A, D215G, R246I, A701V                            |
| Delta (B.1.617.2)   | <b>L452R</b> , <b>T478K</b> , G142D, 156del, 157del, R158G, D614G, P681R, D950N |
| Omicron (B.1.1.529) | K417N, N440K, G446S, S477N, T478K, E484A, Q493K, G496S, Q498R, N501Y, Y505H     |

**Table S2:** The key residues forming the binding partner between spike protein of Wildtype SARS-CoV-2 and DPP4

| DPP4 residue | SARS-CoV-2 Wildtype residue | Mode of interaction | Frequency (%) |
|--------------|-----------------------------|---------------------|---------------|
| A282         | V483                        | Hydrophobic         | 40            |
| A289         | Q493                        | Hydrogen bond       | 40            |
| A291         | Q493                        | Hydrogen bond       | 32            |
| F269         | V483                        | Hydrophobic         | 51.6          |
| I285         | V483                        | Hydrophobic         | 49.1          |
| A291         | Y495                        | Hydrogen bond       | 55.5          |
| A342         | N448                        | Hydrogen bond       | 56.7          |
| Q286         | E484                        | Hydrogen bond       | 48.3          |
| D331         | S494                        | Hydrogen bond       | 49.6          |
| R336         | E484                        | Salt bridge         | 100           |
| K392         | D442                        | Salt bridge         | 100           |
| D393         | K444                        | Salt bridge         | 100           |
| R343         | D442                        | Salt bridge         | 100           |

**Table S3:** The key residues forming the binding partner between spike protein of Alpha SARS-CoV-2 and DPP4

| DPP4 residue | SARS-CoV-2 Alpha residue | Mode of interaction | Frequency (%) |
|--------------|--------------------------|---------------------|---------------|
| A282         | V483                     | Hydrophobic         | 43.45         |
| A289         | Q493                     | Hydrogen bond       | 49.32         |
| F269         | V483                     | Hydrogen bond       | 65.87         |
| I285         | V483                     | Hydrophobic         | 80.57         |
| I287         | V483                     | Hydrophobic         | 71.37         |
| Q344         | K444                     | Hydrophobic         | 34.11         |
| K392         | D442                     | Salt bridge         | 100           |
| R336         | E471                     | Salt bridge         | 100           |
| S284         | K484                     | Hydrogen bond       | 40.70         |
| Q286         | K484                     | Hydrogen bond       | 42.01         |
| A342         | N450                     | Hydrogen bond       | 37.69         |

**Table S4:** The key residues forming the binding partner between spike protein of Beta SARS-CoV-2 and DPP4

| DPP4 residue | SARS-CoV-2 Beta residue | Mode of interaction | Frequency (%) |
|--------------|-------------------------|---------------------|---------------|
| A289         | Q493                    | Hydrogen bond       | 33.90         |
| A291         | F456                    | Hydrophobic         | 51            |
| A291         | Q493                    | Hydrophobic         | 58.73         |
| I285         | V483                    | Hydrophobic         | 20.21         |
| E347         | K444                    | Salt bridge         | 100           |
| E378         | K444                    | Salt bridge         | 100           |
| D393         | K444                    | Salt bridge         | 100           |
| A291         | Y495                    | Hydrogen bond       | 67.44         |
| L294         | G502                    | Hydrogen bond       | 37.70         |
| S292         | G504                    | Hydrogen bond       | 37.16         |

**Table S5:** The key residues forming the binding partner between spike protein of Delta SARS-CoV-2 and DPP4

| DPP4 residue | SARS-CoV-2 Delta residue | Mode of interaction | Frequency (%) |
|--------------|--------------------------|---------------------|---------------|
| A282         | V483                     | Hydrogen bond       | 45.68         |
| A289         | Q493                     | Hydrophobic         | 43.69         |
| A291         | Q493                     | Hydrophobic         | 43.41         |
| K287         | T478                     | Hydrophobic         | 62.86         |
| D331         | R452                     | Salt bridge         | 100           |
| K392         | D442                     | Salt bridge         | 100           |
| E191         | K478                     | Salt bridge         | 100           |
| R336         | E471                     | Salt bridge         | 100           |
| K190         | E484                     | Salt bridge         | 100           |
| E347         | K444                     | Salt bridge         | 100           |
| E332         | R452                     | Salt bridge         | 100           |
| D390         | K444                     | Salt bridge         | 100           |
| D192         | K478                     | Salt bridge         | 100           |
| R343         | D442                     | Salt bridge         | 100           |
| S284         | C488                     | Hydrogen bond       | 53.75         |
| S284         | N487                     | Hydrogen bond       | 47.52         |
| S284         | G485                     | Hydrogen bond       | 46.53         |
| Q344         | G504                     | Hydrogen bond       | 44.10         |
| Y225         | N487                     | Hydrogen bond       | 37.35         |
| E191         | S477                     | Hydrogen bond       | 37.17         |

**Table S6:** The key residues forming the binding partner between spike protein of Gamma SARS-CoV-2 and DPP4

| DPP4 residue | SARS-CoV-2 Gamma residue | Mode of interaction | Frequency (%) |
|--------------|--------------------------|---------------------|---------------|
| A282         | V483                     | Hydrophobic         | 40.89         |
| A289         | Q493                     | Hydrogen bond       | 50.56         |
| A291         | Q493                     | Hydrophobic         | 44.60         |
| F269         | V483                     | Hydrophobic         | 34.37         |
| I285         | V483                     | Hydrogen bond       | 21.11         |
| I287         | V483                     | Hydrophobic         | 29.40         |
| Q286         | N481                     | Hydrophobic         | 27.15         |
| Q344         | K444                     | Hydrophobic         | 32.69         |
| E332         | K484                     | Salt bridge         | 100           |
| D393         | K444                     | Salt bridge         | 100           |
| A342         | N448                     | Hydrogen bond       | 36.50         |

**Table S7:** The key residues forming the binding partner between SARS-CoV-2 Omicron and DPP4

| DPP4 residue | SARS-CoV-2 Omicron residue | Mode of interaction | Frequency (%) |
|--------------|----------------------------|---------------------|---------------|
| A282         | V483                       | Hydrophobic         | 40.45         |
| A289         | Q493                       | Hydrophobic         | 51.26         |
| Q344         | K444                       | Hydrophobic         | 24.98         |
| T288         | Y505                       | Hydrophobic         | 53.71         |
| D390         | K444                       | Salt bridge         | 100           |
| N281         | C488                       | Hydrogen bond       | 51.65         |
| A282         | N487                       | Hydrogen bond       | 28.88         |

**Figure legends**

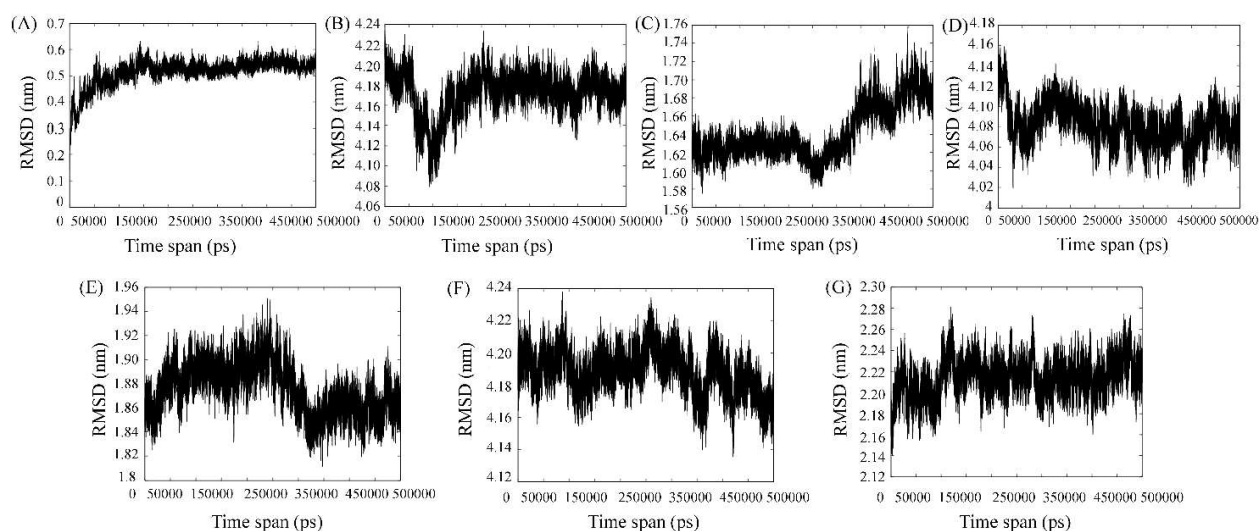

**Figure S1:** RMSD plot of (A) MERS CoV:DPP4, (B) wild-type SARS CoV-2:DPP4, (C) Alpha SARS CoV-2:DPP4, (D) Beta SARS CoV-2:DPP4, (E) Delta SARS CoV-2:DPP4, (F) Gamma-SARS CoV-2:DPP4, (G) Omicron SARS CoV-2:DPP4.

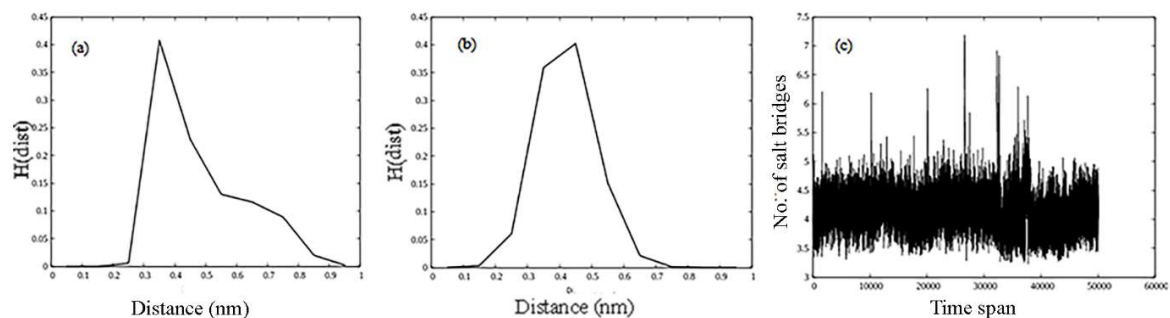

**Figure S2:** (A) Histogram plot of hydrophobic interaction between A282(DPP4) and V483(wild-type SARS CoV-2), (B) Histogram plot of hydrogen interaction between A289(DPP4) and Q493(wild-type SARS CoV-2), (C) Number of Salt bridge interaction between K392(DPP4) and D442(wild-type SARS CoV-2).

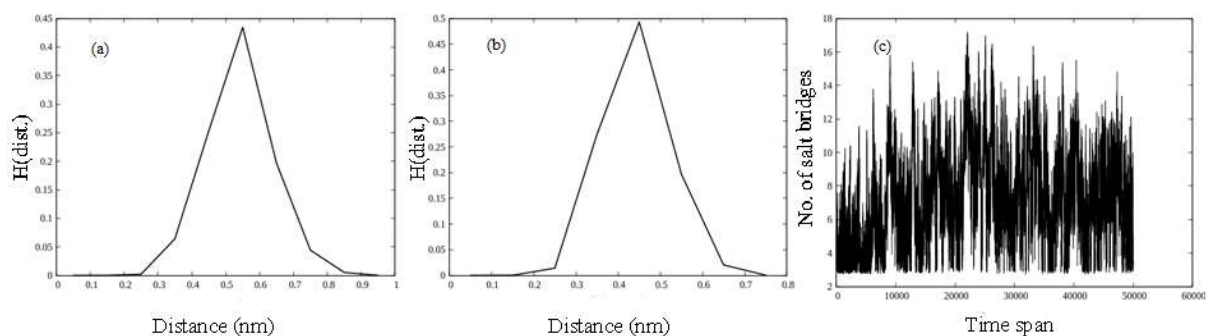

**Figure S3:** (A) Histogram plot of hydrophobic interaction between A282(DPP4) and V483(alpha SARS CoV-2), (B) Histogram plot of hydrogen bond interaction between A289(DPP4) and Q493(alpha SARS CoV-2), (C) Number of Salt bridge interaction between R336(DPP4) and E484(alpha SARS CoV-2).

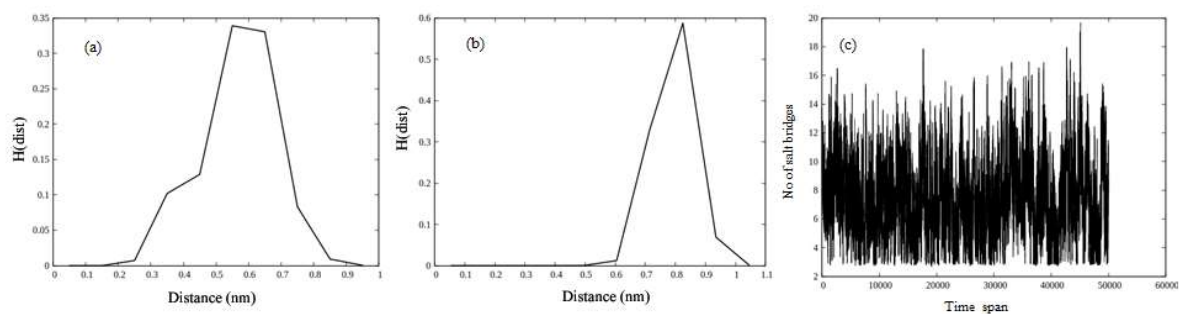

**Figure S4:** (A) Histogram plot of hydrogen bond interaction between A289(DPP4) and Q493(beta SARS CoV-2), (B) Histogram plot of hydrophobic interaction between A291(DPP4) and Q493(beta SARS CoV-2), (C) Number of Salt bridge interaction between D393(DPP4) and K444(beta SARS CoV-2).

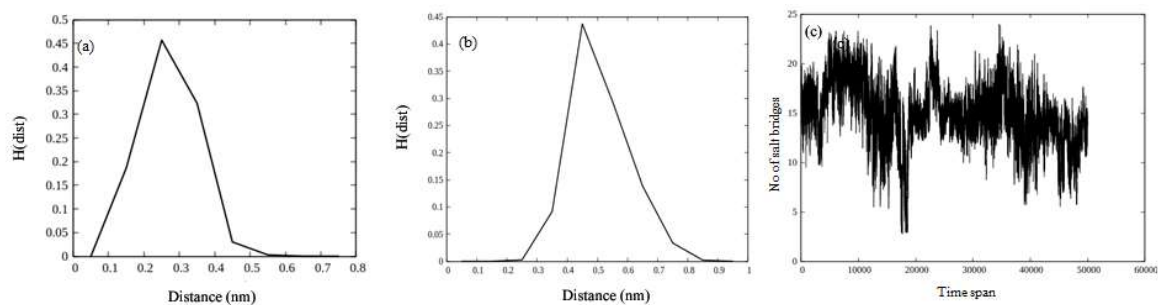

**Figure S5:** (A) Histogram plot of hydrophobic interaction between A282(DPP4) and V483(delta SARS CoV-2), (B) Histogram plot of hydrogen bond interaction between A289(DPP4) and Q493(delta SARS CoV-2), (C) Number of Salt bridge interaction between D390(DPP4) and K444(delta SARS CoV-2).

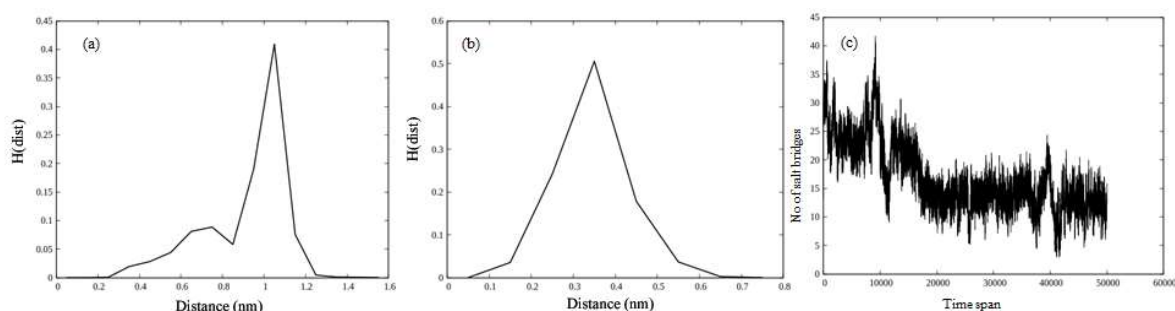

**Figure S6:** (A) Histogram plot of hydrophobic interaction between A282(DPP4) and V483(gamma SARS CoV-2), (B) Histogram plot of hydrogen bond interaction between

A289(DPP4) and Q493(gamma SARS CoV-2), (C) Number of Salt bridge interaction between E332(DPP4) and K484(gamma SARS CoV-2).

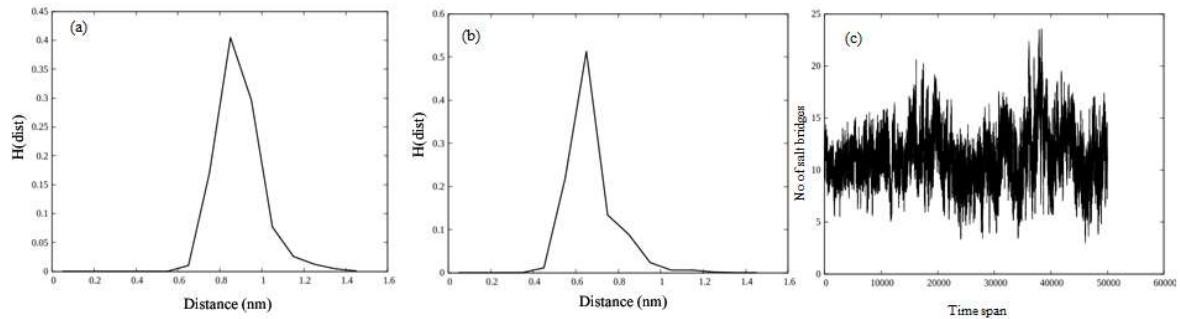

**Figure S7:** (A) Histogram plot of hydrophobic interaction between A282(DPP4) and V483(omicron SARS CoV-2), (B) Histogram plot of hydrophobic interaction between A289(DPP4) and Q493(omicron SARS CoV-2), (C) Number of Salt bridge interaction between D390(DPP4) and K444(omicron SARS CoV-2).

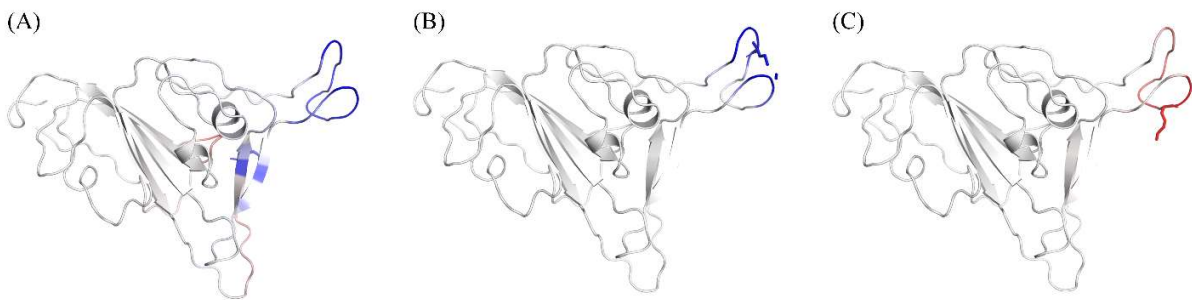

**Figure S8:** Visual representation of the interface mutations on dynamicity and plasticity of the RBD. RBD structure with the (A) L452R and (B) T478K mutation of Delta variant. RBD structure with the E484K mutation of (C) Gamma and Alpha variant. The RBD is represented as cartoon structure and mutations are shown as stick model. Red color in the cartoon structure indicates the flexibility in the protein and blue represents a rigidification of the structure. RBD, receptor binding domain

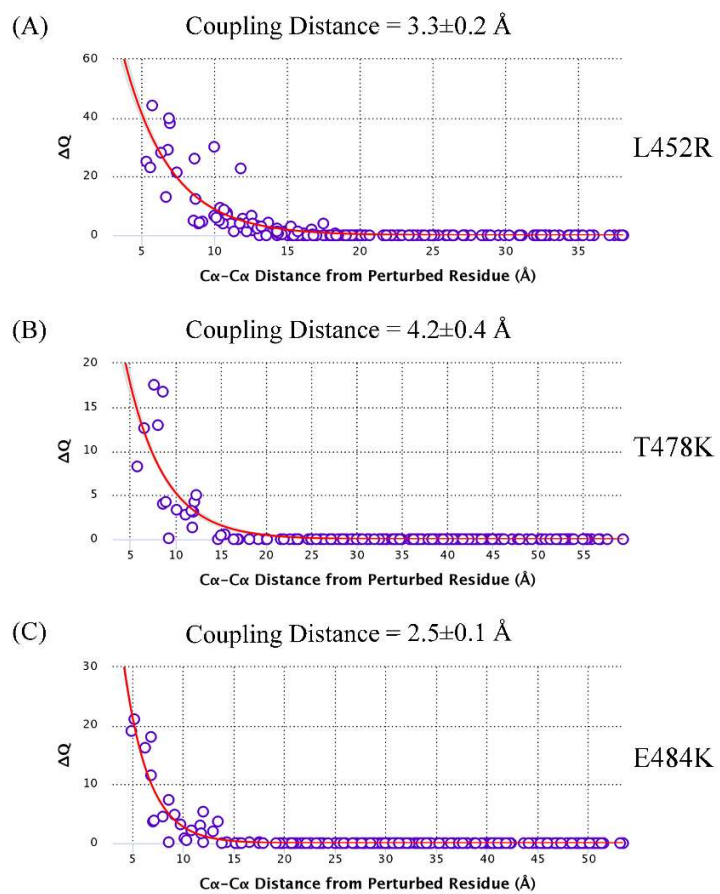

**Figure S9:** Distance dependence of the magnitude of perturbation on other residues ( $\Delta Q$ ) from the perturbed site of (A) R452 & (B) K478 in Delta and (C) K484 in Gamma and Alpha



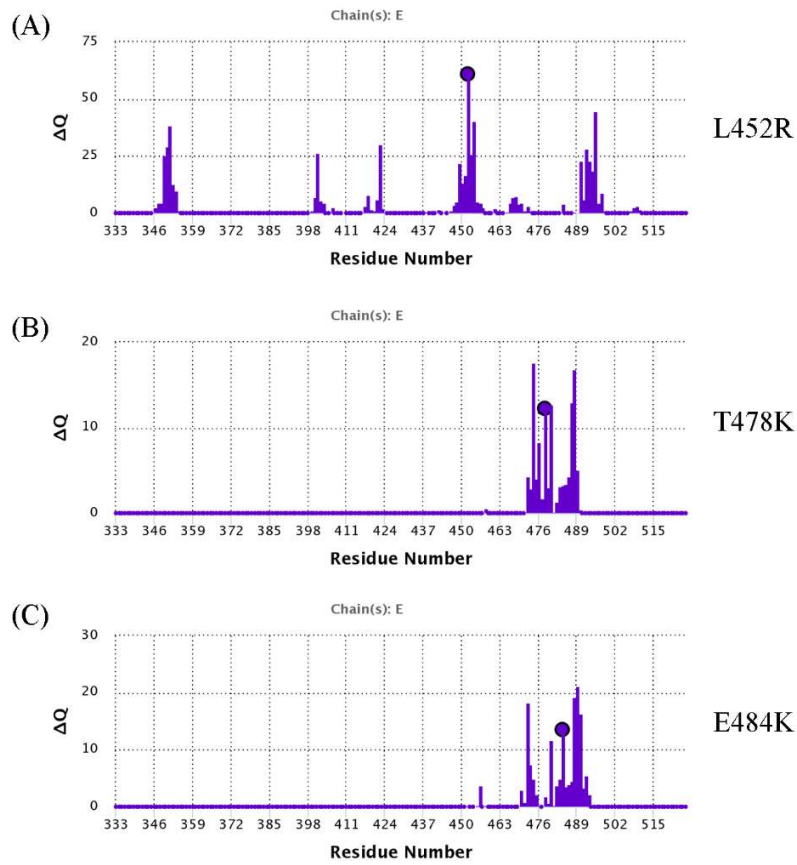

**Figure S10:** Residue-wise Perturbation Residue Scanning profile ( $\Delta Q$ ) distance from the perturbation site which is shown in dot in the graph shown for three interface mutations present on the RBD. (A) L452R (B) T478K (C) E484K (the residue that is perturbed is highlighted by a circle).
