# Supplementary material for: Unraveling DPP4 Receptor Interactions with SARS-CoV-2 Variants and MERS-CoV: Insights into Pulmonary Disorders via Immunoinformatics and Molecular Dynamics
Source: Viruses. 2023 Oct 6;15(10):2056. doi: 10.3390/v15102056 (PMC10612102; doi:10.3390/v15102056)
Supplement: Supplementary file 1 [file viruses-15-02056-s001.zip]

Archive with 11 entries (11 files):
- Figure S1.tif
- Figure S10.tif
- Figure S2.tif
- Figure S3.tif
- Figure S4.tif
- Figure S5.tif
- Figure S6.tif
- Figure S7.tif
- Figure S8.tif
- Figure S9.tif
- viruses-2629526-supplementary file.pdf
